# Supplementary material for: Prioritizing the Welfare of Vulnerable Nations Promotes Equitable Achievement of Paris Target
Source: Research Square preprint supplement (doi:10.21203/rs.3.rs-6445667/v1), 2025-04-16
Supplement: Supplementary file 1 [file 882fff998ed1fd8d48bb7300.xlsx]

## Sheet: Sheet1
9 Macro Regions	JUSTICE Regions	Countries
United States	United States of America	United States
India	India	India
China	China	China
Other High Income	Australia	Australia
	Canada	Canada
	South Korea	South Korea
	Japan	Japan
Europe	Austria	Austria
	Belgium	Belgium
	Baltic States	Estonia, Latvia, Lithuania
	Denmark	Denmark
	Spain	Spain
	Finland	Finland
	France	France
	United Kingdom	United Kingdom
	Greece	Greece
	Hungary	Hungary
	Ireland	Ireland
	Italy	Italy
	Netherlands	Netherlands
	Norway	Norway
	Poland	Poland
	Portugal	Portugal
	Czechia	Czech Republic
	Germany	Germany
	Slovakia	Slovakia
	Slovenia	Slovenia
	Switzerland	Switzerland
	Sweden	Sweden
	Bulgaria	Bulgaria
	Croatia	Croatia
	Other European Countries	Åland Islands, Albania, Andorra, Bosnia and Herzegovina, Cyprus, Faroe Islands, Gibraltar, Greenland, Guernsey, Iceland, Isle of Man, Jersey, Kosovo, Liechtenstein, Luxembourg, Malta, Monaco, Montenegro, North Macedonia, San Marino, Serbia, Svalbard and Jan Mayen, Vatican City
	Romania	Romania
South and Southeast Asia	Indonesia	Indonesia
	Malaysia	Malaysia
	Other Southeast Asia	Brunei Darussalam, Cambodia, Cocos (Keeling) Islands, Hong Kong, Lao People’s Democratic Republic, Macao, Mongolia, Myanmar, North Korea, Philippines, Singapore, Taiwan
	Rest South Asia	Afghanistan, Bangladesh, Bhutan, Maldives, Nepal, Pakistan, Sri Lanka
	Thailand	Thailand
	Vietnam	Vietnam
	Rest Pacific Islands	American Samoa, Christmas Island, Cook Islands, Fiji, French Polynesia, Guam, Heard Island and McDonald Islands, Kiribati, Marshall Islands, Micronesia, Nauru, New Caledonia, New Zealand, Niue, Norfolk Island, Northern Mariana Islands, Palau, Papua New Guinea, Pitcairn, Samoa, Solomon Islands, Tokelau, Tonga, Tuvalu, United States Minor Outlying Islands, Vanuatu, Wallis and Futuna
Gulf Countries	Gulf Countries	Bahrain, Iran, Iraq, Kuwait, Oman, Qatar, Saudi Arabia, United Arab Emirates, Yemen
Sub-Saharan Africa	Sub-Saharan Africa	Angola, Benin, Botswana, British Indian Ocean Territory, Bouvet Island, Burkina Faso, Burundi, Cameroon, Cape Verde, Central African Republic, Chad, Comoros, Congo, Democratic Republic of the Congo, Côte d’Ivoire, Djibouti, Equatorial Guinea, Eritrea, Eswatini, Ethiopia, French Southern and Antarctic Lands, Gabon, Gambia, Ghana, Guinea, Guinea-Bissau, Kenya, Lesotho, Liberia, Madagascar, Malawi, …
Rest of the World	South Africa	South Africa
	Argentina	Argentina
	Brazil	Brazil
	Chile	Chile
	Mexico	Mexico
	Rest Central America	Anguilla, Antigua and Barbuda, Aruba, Bahamas, Barbados, Belize, Bermuda, Bonaire, Sint Eustatius and Saba, British Virgin Islands, Cayman Islands, Costa Rica, Cuba, Curaçao, Dominica, Dominican Republic, El Salvador, Grenada, Guatemala, Guadeloupe, Haiti, Honduras, Jamaica, Martinique, Montserrat, Nicaragua, Panama, Puerto Rico, Saint Barthelemy, Saint Kitts and Nevis, Saint Lucia, Saint Martin …
	Rest South America	Bolivia, Colombia, Ecuador, Falkland Islands (Malvinas), French Guiana, Guyana, Paraguay, Peru, Suriname, Uruguay, Venezuela
	Former Soviet Union	Armenia, Azerbaijan, Belarus, Georgia, Kazakhstan, Kyrgyzstan, Moldova, Tajikistan, Turkmenistan, Uzbekistan
	Ukraine	Ukraine
	Egypt	Egypt
	Middle East	Israel, Jordan, Lebanon, Palestine, Syria
	Western Sahara, Tunisia, Morocco	Morocco, Tunisia, Western Sahara
	Algeria, Libya	Algeria, Libya
	Turkey	Turkey
	Russia	Russia
